# Supplementary material for: A Relationship between NTP and Cell Extract Concentration for Cell-Free Protein Expression
Source: MDPI journal article supplement (doi:10.3390/life11030237), 2021-03-13
Supplement: s1 [file s1]

## **Supplementary Information**

### **A relationship between NTP and cell extract concentration for cell-free protein expression**

Katsuki Takahashi, Gaku Sato, Nobuhide Doi, Kei Fujiwara\*

**Supplementary Figures S1-S4**

| GFP synthesis (μg/mL) |    | cell extract (mg/mL) |        |        |        |
|-----------------------|----|----------------------|--------|--------|--------|
|                       |    | 20                   | 30     | 40     | 50     |
| Mg conc (mM)          | 5  | 20±3                 | 102±15 | 144±9  | 154±17 |
|                       | 10 | 205±37               | 298±27 | 149±11 | 118±6  |
|                       | 15 | 325±38               | 329±44 | 221±18 | 142±31 |
|                       | 20 | 198±26               | 332±39 | 191±9  | 103±43 |
|                       | 25 | 71±35                | 328±41 | 93±8   | 28±17  |

**Supplementary Figure S1. Mg dependence of high concentration cell extract on CFPS activity.**

Averages and standard error of 3 times experiments performed in different days were shown.

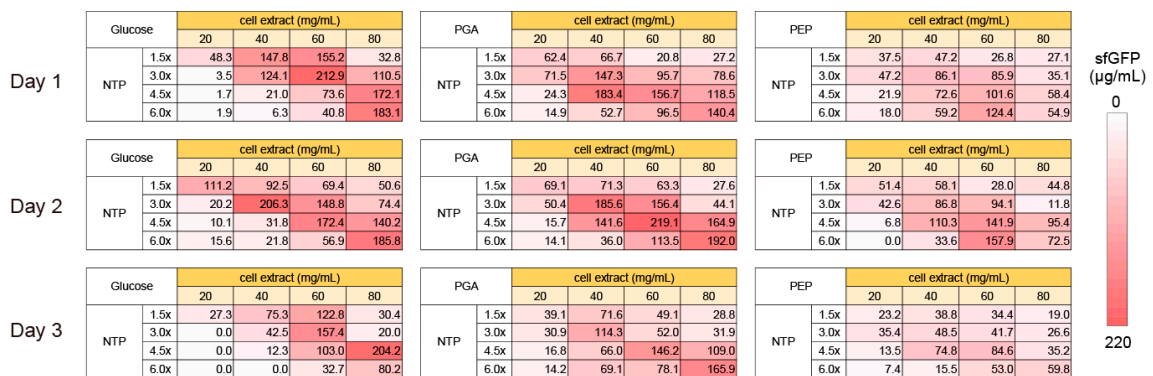

**Supplementary Figure S2. Energy source dependence of high concentration cell extract on CFPS activity.** Raw data of Figure 4 are shown. The values indicate the levels of sfGFP synthesis (μg/mL).

|       |                         |                      |        |        |        |        |
|-------|-------------------------|----------------------|--------|--------|--------|--------|
| Day 1 | ATP<br>(mM)             | cell extract (mg/mL) |        |        |        |        |
|       |                         | sfGFP (μg/mL)        | 20     | 40     | 60     | 80     |
|       |                         | 0                    | 69.69  | 99.04  | 50.91  | 32.76  |
|       |                         | 5                    | 48.81  | 117.36 | 98.22  | 69.72  |
|       |                         | 10                   | 30.32  | 75.81  | 128.49 | 109.64 |
| Day 2 | ATP<br>(mM)             | cell extract (mg/mL) |        |        |        |        |
|       |                         | sfGFP (μg/mL)        | 20     | 40     | 60     | 80     |
|       |                         | 0                    | 28.51  | 38.93  | 28.97  | 12.51  |
|       |                         | 5                    | 12.43  | 77.09  | 59.39  | 37.98  |
|       |                         | 10                   | 6.98   | 35.18  | 80.59  | 51.89  |
| Day 3 | ATP<br>(mM)             | cell extract (mg/mL) |        |        |        |        |
|       |                         | sfGFP (μg/mL)        | 20     | 40     | 60     | 80     |
|       |                         | 0                    | 52.59  | 94.47  | 73.48  | 19.43  |
|       |                         | 5                    | 63.66  | 107.08 | 111.38 | 94.32  |
|       |                         | 10                   | 31.72  | 52.42  | 59.88  | 82.10  |
| Day 1 | ADP<br>(mM)             | cell extract (mg/mL) |        |        |        |        |
|       |                         | sfGFP (μg/mL)        | 20     | 40     | 60     | 80     |
|       |                         | 0                    | 69.69  | 99.04  | 50.91  | 32.76  |
|       |                         | 5                    | 80.58  | 113.70 | 100.59 | 69.80  |
|       |                         | 10                   | 44.24  | 111.45 | 145.83 | 98.18  |
| Day 2 | ADP<br>(mM)             | cell extract (mg/mL) |        |        |        |        |
|       |                         | sfGFP (μg/mL)        | 20     | 40     | 60     | 80     |
|       |                         | 0                    | 28.51  | 38.93  | 28.97  | 12.51  |
|       |                         | 5                    | 25.01  | 74.90  | 62.35  | 30.25  |
|       |                         | 10                   | 2.53   | 87.01  | 90.19  | 45.10  |
| Day 3 | ADP<br>(mM)             | cell extract (mg/mL) |        |        |        |        |
|       |                         | sfGFP (μg/mL)        | 20     | 40     | 60     | 80     |
|       |                         | 0                    | 52.59  | 94.47  | 73.48  | 19.43  |
|       |                         | 5                    | 81.83  | 122.88 | 105.28 | 48.53  |
|       |                         | 10                   | 83.44  | 85.69  | 110.24 | 93.87  |
| Day 1 | dATP<br>(mM)            | cell extract (mg/mL) |        |        |        |        |
|       |                         | sfGFP (μg/mL)        | 20     | 40     | 60     | 80     |
|       |                         | 0                    | 69.69  | 99.04  | 50.91  | 32.76  |
|       |                         | 5                    | 38.62  | 67.99  | 111.56 | 68.24  |
|       |                         | 10                   | 16.48  | 44.95  | 106.27 | 89.13  |
| Day 2 | dATP<br>(mM)            | cell extract (mg/mL) |        |        |        |        |
|       |                         | sfGFP (μg/mL)        | 20     | 40     | 60     | 80     |
|       |                         | 0                    | 28.51  | 38.93  | 28.97  | 12.51  |
|       |                         | 5                    | 14.53  | 54.47  | 54.91  | 27.94  |
|       |                         | 10                   | 6.22   | 21.29  | 44.28  | 36.94  |
| Day 3 | dATP<br>(mM)            | cell extract (mg/mL) |        |        |        |        |
|       |                         | sfGFP (μg/mL)        | 20     | 40     | 60     | 80     |
|       |                         | 0                    | 52.59  | 94.47  | 73.48  | 19.43  |
|       |                         | 5                    | 20.01  | 57.92  | 74.86  | 55.12  |
|       |                         | 10                   | 3.77   | 16.87  | 14.72  | 62.81  |
| Day 1 | Adenosine<br>(mM)       | cell extract (mg/mL) |        |        |        |        |
|       |                         | sfGFP (μg/mL)        | 20     | 40     | 60     | 80     |
|       |                         | 0                    | 69.69  | 99.04  | 50.91  | 32.76  |
|       |                         | 5                    | 77.57  | 109.32 | 82.74  | 58.05  |
|       |                         | 10                   | 91.00  | 126.44 | 97.82  | 75.38  |
| Day 2 | Adenosine<br>(mM)       | cell extract (mg/mL) |        |        |        |        |
|       |                         | sfGFP (μg/mL)        | 20     | 40     | 60     | 80     |
|       |                         | 0                    | 28.51  | 38.93  | 28.97  | 12.51  |
|       |                         | 5                    | 58.19  | 87.07  | 85.09  | 18.17  |
|       |                         | 10                   | 44.22  | 83.05  | 70.23  | 27.77  |
| Day 3 | Adenosine<br>(mM)       | cell extract (mg/mL) |        |        |        |        |
|       |                         | sfGFP (μg/mL)        | 20     | 40     | 60     | 80     |
|       |                         | 0                    | 52.59  | 94.47  | 73.48  | 19.43  |
|       |                         | 5                    | 88.37  | 128.70 | 108.10 | 24.10  |
|       |                         | 10                   | 107.33 | 145.59 | 125.45 | 44.38  |
| Day 1 | Cell extract<br>(mg/mL) | sfGFP (μg/mL)        |        |        |        |        |
|       |                         | 20                   | 40     | 60     | 80     |        |
|       |                         | 0                    | 69.69  | 99.04  | 50.91  | 32.76  |
|       |                         | 5                    | 77.57  | 109.32 | 82.74  | 58.05  |
|       |                         | 10                   | 91.00  | 126.44 | 97.82  | 75.38  |
| Day 2 | Cell extract<br>(mg/mL) | sfGFP (μg/mL)        |        |        |        |        |
|       |                         | 20                   | 40     | 60     | 80     |        |
|       |                         | 0                    | 28.51  | 38.93  | 28.97  | 12.51  |
|       |                         | 5                    | 58.19  | 87.07  | 85.09  | 18.17  |
|       |                         | 10                   | 44.22  | 83.05  | 70.23  | 27.77  |
| Day 3 | Cell extract<br>(mg/mL) | sfGFP (μg/mL)        |        |        |        |        |
|       |                         | 20                   | 40     | 60     | 80     |        |
|       |                         | 0                    | 52.59  | 94.47  | 73.48  | 19.43  |
|       |                         | 5                    | 88.37  | 128.70 | 108.10 | 24.10  |
|       |                         | 10                   | 107.33 | 145.59 | 125.45 | 44.38  |

**Supplementary Figure S3. Effect of ATP and its derivative of high concentration cell extract on CFPS activity.** Raw data of Figure 5 are shown. Setting of the heat map is the same as in Figure 5. The values indicate the levels of sfGFP synthesis (μg/mL).

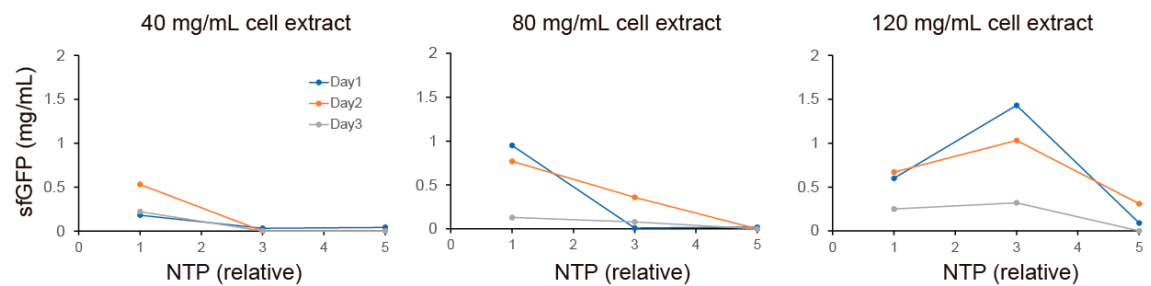

**Supplementary Figure S4. NTP requirement of high concentration cell extract for cell-free protein synthesis.** Raw data of dialysis-mode results in Figure 6 are shown.
